# Supplementary material for: Elevated Wnt2 and Wnt4 activate NF-κB signaling to promote cardiac fibrosis by cooperation of Fzd4/2 and LRP6 following myocardial infarction
Source: PubMed Central journal article supplement — eBioMedicine. 2021 Dec 12;74:103745. doi: 10.1016/j.ebiom.2021.103745 (PMC8669316; doi:10.1016/j.ebiom.2021.103745), 2021-12-12
Supplement: mmc4.pdf [file mmc4.pdf]

## Supplementary tables

Table S1: All the primers used in the qPCR analysis.

| GENE           | Forward primer (5'-3')  | Reverse primer (5'-3')  |
|----------------|-------------------------|-------------------------|
| Fzd2           | CCTCAAGGTGCCGTCCTATC    | GGATCCAGAGACGGGCAAAA    |
| Fzd4           | AGCTGCAGTTCTTCTTTGTTC   | TTTCACCCAGATGTACTGATCG  |
| $\beta$ -actin | CGTGCGTGACATTAAAGAGAAGC | TGGATGCCACAGGATTCCATACC |
| NPPA           | CCGGTACCGAAGATAACAGC    | CTCCAGGAGGGTATTACCA     |
| NPPB           | TGGGAAGTCCTAGCCAGTCTC   | GCCGATCCGGTCTATCTTCTG   |

Table S2: All the primary antibodies used in the western blots analysis

| Antibody                                                                    | Company                           | Catalog#   | Size (kDa) | 2°     | RRID        |
|-----------------------------------------------------------------------------|-----------------------------------|------------|------------|--------|-------------|
| Phospho-NF- $\kappa$ B p65 (Ser536) (93H1) Rabbit mAb #3033                 | Cell Signaling Technology, BOSTON | 3033       | 65         | Rabbit | AB_331284   |
| NF- $\kappa$ B p65 (D14E12) XP® Rabbit mAb #8242                            | Cell Signaling Technology, BOSTON | 8242       | 65         | Rabbit | AB_10859369 |
| Non-phospho (Active) $\beta$ -Catenin (Ser45) (D2U8Y) XP® Rabbit mAb #19807 | Cell Signaling Technology, BOSTON | 19807      | 108        | Rabbit | AB_2650576  |
| Anti-Wnt2/IRP antibody (ab 109222)                                          | Abcam Cambridge                   | ab109222   | 34         | Rabbit | AB_10862500 |
| Anti-TGF beta 1 antibody(ab92486)                                           | Abcam Cambridge                   | ab92486    | 44         | Rabbit | AB_10562492 |
| Anti-Frizzled 4 antibody (ab83042)                                          | Abcam Cambridge                   | ab83042    | 65         | Rabbit | AB_1860094  |
| Anti-alpha smooth muscle Actin antibody (ab5694)                            | Abcam Cambridge                   | (ab5694)   | 42         | Rabbit | AB_2223021  |
| Frizzled 2 Polyclonal Antibody                                              | Proteintech Chicago               | 24272-1-AP | 64         | Rabbit | AB_2879463  |
| MMP2 Polyclonal                                                             | Proteintech                       | 10373-2-   | 72         | Rabbit | AB_2250823  |

|                                                                                 |                                         |                |           |        |             |
|---------------------------------------------------------------------------------|-----------------------------------------|----------------|-----------|--------|-------------|
| Antibody                                                                        | Chicago                                 | AP             |           |        |             |
| MMP9(N-Terminal)<br>Polyclonal Antibody                                         | Proteintech<br>Chicago                  | 10375-2-<br>AP | 105       | Rabbit | AB_10897178 |
| Collagen Type III (N-<br>Terminal) Polyclonal<br>Antibody                       | Proteintech<br>Chicago                  | 22734-1-<br>AP | 185       | Rabbit | AB_2879158  |
| HRP-Conjugated<br>GAPDH Monoclonal<br>Antibody                                  | Proteintech<br>Chicago                  | HRP-<br>60004  | 36        | Mouse  | AB_2737588  |
| HRP-Conjugated Beta<br>Actin Monoclonal<br>Antibody                             | Proteintech<br>Chicago                  | HRP-<br>60008  | 42        | Mouse  | AB_2819183  |
| CTGF Polyclonal<br>Antibody                                                     | Proteintech<br>Chicago                  | 23936-1-<br>AP | 42        | Rabbit | AB_2736836  |
| Wnt-4 Antibody                                                                  | R&D Systems<br>Minnesota                | AF475          | 42        | Goat   | AB_355382   |
| Anti-Collagen Type I<br>Antibody                                                | Millipore<br>Temecula                   | ABT123         | 180       | Rabbit | AB_521242   |
| LRP6 (C47E12) Rabbit<br>mAb #3395                                               | Cell Signaling<br>Technology,<br>BOSTON | 3395           | 210       | Rabbit | AB_1950408  |
| $\beta$ -Catenin (D10A8)<br>XP® Rabbit mAb #8480                                | Cell Signaling<br>Technology,<br>BOSTON | 8480           | 108       | Rabbit | AB_11127855 |
| Lamin B1 (D9V6H)<br>Rabbit mAb #13435                                           | Cell Signaling<br>Technology,<br>BOSTON | 13435          | 68        | Rabbit | AB_2737428  |
| Phospho-Smad2<br>(Ser465/467)/Smad3<br>(Ser423/425) (D27F4)<br>Rabbit mAb #8828 | Cell Signaling<br>Technology,<br>BOSTON | 8828           | 52,6<br>0 | Rabbit | AB_2631089  |
| Wnt5a Antibody                                                                  | GeneTex,<br>California                  | GTX1111<br>87  | 42        | Rabbit | AB_10617364 |
| Wnt11 Antibody                                                                  | GeneTex,<br>California                  | GTX1059<br>71  | 39        | Rabbit | AB_1952580  |

Table S3. Correlation analysis of serumWnt2 or Wnt4 level with basic and echocardiographic parameters of MI patients.

|              | <b>parameters</b> | <b>r</b> | <b>P</b> |
|--------------|-------------------|----------|----------|
| Wnt2         | Wnt4              | 0.250    | 0.009    |
|              | Sex               | 0.023    | 0.814    |
|              | Age               | 0.000    | 0.999    |
|              | SBP               | -0.065   | 0.501    |
|              | DBP               | -0.038   | 0.692    |
|              | Smoker            | 0.184    | 0.055    |
|              | Diabetes          | 0.210    | 0.028    |
|              | Hypertension      | 0.183    | 0.057    |
|              | LAD               | 0.179    | 0.078    |
|              | LVEF              | -0.07    | 0.475    |
|              | LVED              | 0.001    | 0.712    |
|              | IVS               | 0.019    | 0.851    |
|              | LVPW              | 0.057    | 0.579    |
|              | Wnt4              | Sex      | 0.036    |
| Age          |                   | -0.05    | 0.595    |
| SBP          |                   | -0.025   | 0.796    |
| DBP          |                   | -0.045   | 0.639    |
| Smoker       |                   | -0.052   | 0.595    |
| Diabetes     |                   | 0.161    | 0.095    |
| Hypertension |                   | 0.034    | 0.726    |
| LAD          |                   | 0.085    | 0.407    |
| LVEF         |                   | 0.001    | 0.990    |
| LVED         |                   | 0.096    | 0.344    |
| IVS          |                   | 0.030    | 0.766    |
| LVPW         |                   | 0.023    | 0.824    |

Spearman's rank correlation coefficient was used to assess the correlation between two indicated factors. P value of < 0.05 was considered significant. SBP, systolic blood pressure; DBP, diastolic blood pressure; LVEF, Left ventricular ejection fraction; LVED, Left ventricular end diastolic diameter; LAD, Left atrium diameter; IVS, interventricular septum; LVPW, left ventricular posterior wall.
